# Supplementary material for: Phenotypic variation in dorsal fin morphology of coastal bottlenose dolphins (Tursiops truncatus) off Mexico
Source: PeerJ. 2017 Jun 13;5:e3415. doi: 10.7717/peerj.3415 (PMC5472037; doi:10.7717/peerj.3415)
Supplement: Supplemental Information 2 — Sheet (1) The Variation Coefficients computed to generate the General Index of Variability (GIV) for Fig. 4 in the manuscript. Sheet (2) The normality tests along with the box & whiskers plot for the log transformed measurement ratios. Sheet (3) The summary of the Factor analysis for Table 2 in the manuscript. Sheet (4) The summary of the Discriminant function analysis for Table 2 in the manuscript. Sheet (5) The input data for the Mantel’s tests for Table 3 in the manuscript. Sheet (6) The result of the Cluster Analysis for Fig. 5 in the manuscript. Sheet (7) The results of the Mantel’s test for all the study areas. Sheet (8) The results of the partial Mantel’s test for site comparisons between the Pacific Ocean and the Gulf of California. Sheet (9) The results of the partial Mantel’s test for site comparisons within the Pacific Ocean. Sheet (10) The results of the partial Mantel’s test for site comparisons within the Gulf of California. Sheet (11) The results of the partial Mantel’s test for site comparisons within the Gulf of Mexico. [file peerj-05-3415-s002.xls]

## Sheet: 1) GIV
Sample							Inverse General Index of Variability (proportional overall variablity)
	EN	SQ	BM	MZ	BB	PE	UG	SJ	BL	BK	SM	LP	TA	NA	VR	AL	TB	TL	HO	Average
2	0.0407446	0.0351674	0.27	0.29	0.0394261	0.19	0.0420298	0.0476584	0.0623934	0.0367784	0.0489972	0.0376792	0.0528529	0.15	0.12	0.21	0.24	0.0287384	0.0331883	0.103982
3	0.582241	0.484367	0.525418	0.417603	0.587062	0.591536	0.456459	0.624184	0.338811	0.573196	0.547912	0.506132	0.538896	0.534	0.617	0.61	0.534302	0.507521	0.558081	0.533406
4	0.741534	0.630718	0.662354	0.595574	0.714584	0.736788	0.696915	0.729043	0.626345	0.7302	0.719485	0.599582	0.709876	0.652	0.753	0.746	0.702691	0.681318	0.721062	0.692056
5	0.823987	0.684873	0.736426	0.729466	0.808572	0.805926	0.777216	0.807463	0.734816	0.812633	0.816159	0.745012	0.815514	0.704	0.81	0.803	0.780347	0.792341	0.76535	0.776479
6	0.828094	0.792566	0.807852	0.802557	0.843731	0.847378	0.84195	0.85306	0.822582	0.848253	0.847631	0.792067	0.819828	0.771	0.876	0.869	0.833799	0.8515	0.813096	0.829576
7	0.863134	0.852303	0.855638	0.850054	0.879566	0.889852	0.872937	0.875905	0.859054	0.883844	0.860707	0.83007	0.868945	0.846	0.891	0.897	0.872167	0.879122	0.862209	0.867869
8	0.887596	0.88118	0.877633	0.871422	0.89468	0.906488	0.904009	0.906324	0.898223	0.908177	0.890764	0.872322	0.899533	0.871	0.896	0.914	0.889588	0.895808	0.880366	0.891848
9	0.908792	0.904623	0.892772	0.883183	0.901515	0.923053	0.921192	0.928764	0.896936	0.913682	0.909301	0.901744	0.925745	0.901	0.904	0.928	0.913232	0.9168	0.906662	0.909526
10	0.919286	0.92459	0.908087	0.89901	0.912178	0.930934	0.936959	0.943802	0.924599	0.925895	0.927975	0.919387	0.93865	0.919	0.948	0.941	0.922683	0.930603	0.911761	0.925495
11	0.934413	0.928766	0.91502	0.910757	0.921869	0.940466	0.94954	0.953248	0.940913	0.938531	0.940274	0.923719	0.950087	0.943	0.956	0.949	0.932289	0.940442	0.921134	0.936288
12	0.942574	0.941631	0.928559	0.922782	0.93608	0.951368	0.958948	0.963304	0.95408	0.949035	0.952443	0.935882	0.958521	0.951	0.939	0.957	0.935266	0.938803	0.928726	0.944474
13	0.9514	0.951903	0.93699	0.925258	0.942671	0.960917	0.966723	0.96757	0.961648	0.956446	0.962158	0.931708	0.966505	0.956	0.943	0.963	0.945829	0.947423	0.941233	0.951494
14	0.954629	0.958794	0.942915	0.932047	0.947629	0.968532	0.972756	0.968094	0.969932	0.962252	0.966802	0.938058	0.973769	0.967	0.956	0.977	0.954058	0.953609	0.951506	0.958704
15	0.951299	0.964994	0.949955	0.939081	0.955511	0.975498	0.978262	0.973458	0.978187	0.961246	0.973139	0.946047	0.979531	0.977	0.961	0.983	0.958476	0.956392	0.957557	0.964191
16	0.960486	0.97009	0.956338	0.944306	0.963178	0.98162	0.982079	0.978929	0.986141	0.967407	0.978717	0.954262	0.986456	0.984	0.964	0.985	0.963828	0.962521	0.962133	0.970079
17	0.96795	0.974719	0.959882	0.9486	0.965637	0.985553	0.985426	0.981798	0.991152	0.970412	0.981011	0.962314	0.991162	0.986	0.965	0.987	0.96743	0.964317	0.96754	0.973837
18	0.974183	0.97867	0.965125	0.952767	0.972174	0.99039	0.989031	0.983898	0.995653	0.974031	0.984481	0.968104	0.994086	0.988	0.968	0.988	0.971158	0.968638	0.970676	0.97774
19	0.979169	0.981292	0.969178	0.957668	0.977656	0.993738	0.990991	0.98772	1	0.978586	0.987403	0.972904	0.997505	0.991	0.97	0.989	0.973687	0.972482	0.97189	0.981151
20	0.98354	0.983087	0.97248	0.961995	0.982466	0.997393	0.994575	0.992113		0.982506	0.992199	0.976072	1	0.993	0.974	0.99	0.976744	0.976096	0.97439	0.983481
21	0.985555	0.986522	0.976328	0.965933	0.986728	1	0.995039	0.995435		0.981306	0.989708	0.980111		0.993	0.977	0.991	0.97892	0.979495	0.975343	0.984554
22	0.988587	0.989214	0.977739	0.967698	0.986858		0.997846	0.9974		0.983648	0.993664	0.984012		0.994	0.979	0.993	0.980676	0.981061	0.977289	0.985731
23	0.991571	0.990157	0.979338	0.969608	0.989112		1	0.998655		0.986338	0.995158	0.987435		0.994	0.984	0.994	0.982812	0.983038	0.979585	0.9878
24	0.993959	0.992577	0.981742	0.97179	0.9915			1		0.989538	0.997791	0.989986		0.995	0.986	0.995	0.984105	0.982718	0.98249	0.988946
25	0.995981	0.994961	0.984138	0.972834	0.993908					0.992107	1	0.990785		0.996	0.989	0.996	0.986958	0.985202	0.985712	0.990256
26	0.998023	0.995912	0.985759	0.975221	0.996198					0.992804		0.993707		0.997	0.991	0.997	0.98935	0.987741	0.987958	0.99136
27	1	0.997118	0.987534	0.977664	0.998544					0.995262		0.996225		0.997	0.995	0.998	0.990522	0.989401	0.98864	0.993147
28		0.998761	0.989084	0.979222	1					0.997285		0.99826		0.998	0.997	0.999	0.992569	0.991193	0.990941	0.994276
29		1	0.999	0.989603						0.999063		1		0.999	0.999	0.999	0.993733	0.991532	0.992932	0.996624
30			1	1						1				1	1	1	0.99506	0.992738	0.994381	0.99802
31																	0.99571	0.993327	0.995092	0.99471
32																	0.996883	0.994127	0.996637	0.995882
33																	0.998011	0.995301	0.997719	0.99701
34																	0.998596	0.9964	0.997789	0.997595
35																	1	0.997705	0.999293	0.998999
36																		0.998998	1	0.999499
37																		1		1
						General Index of Variability (GIV) (proportional VC from all Log transformed measurement ratios)
Sample	EN	SQ	BM	MZ	BB	PE	UG	SJ	BL	BK	SM	LP	TA	NA	VR	AL	TB	TL	HO
2	1	1	1	1	1	1	1	1	1	1	1	1	1	1	1	1	1	1	1
3	0.458504	0.550801	0.501582	0.601	0.452364	0.463736	0.585571	0.423474	0.723582	0.463583	0.501086	0.531548	0.513956	0.491	0.412	0.412	0.498163	0.521218	0.475107
4	0.29921	0.40445	0.364646	0.42303	0.324842	0.318484	0.345114	0.318616	0.436048	0.306578	0.329512	0.438097	0.342977	0.373	0.276	0.276	0.329773	0.34742	0.312126
5	0.216758	0.350294	0.290574	0.289137	0.230854	0.249346	0.264814	0.240195	0.327578	0.224145	0.232838	0.292667	0.237339	0.321	0.219	0.219	0.252118	0.236397	0.267838
6	0.212651	0.242602	0.219148	0.216046	0.195695	0.207894	0.20008	0.194598	0.239812	0.188526	0.201366	0.245612	0.233025	0.254	0.153	0.153	0.198665	0.177238	0.220092
7	0.177611	0.182864	0.171362	0.168549	0.159861	0.16542	0.169093	0.171753	0.203339	0.152935	0.18829	0.207609	0.183908	0.179	0.138	0.125	0.160298	0.149616	0.170979
8	0.153148	0.153987	0.149367	0.147181	0.144746	0.148784	0.138021	0.141335	0.164171	0.128602	0.158233	0.165357	0.15332	0.154	0.133	0.108	0.142876	0.13293	0.152822
9	0.131953	0.130545	0.134228	0.135421	0.137911	0.132219	0.120838	0.118894	0.165458	0.123097	0.139696	0.135936	0.127108	0.124	0.125	0.094	0.119232	0.111938	0.126526
10	0.121458	0.110578	0.118913	0.119593	0.127248	0.124337	0.105071	0.103856	0.137795	0.110883	0.121022	0.118292	0.114203	0.106	0.081	0.081	0.109781	0.0981349	0.121427
11	0.106332	0.106402	0.11198	0.107846	0.117558	0.114806	0.0924903	0.0944099	0.12148	0.0982475	0.108723	0.11396	0.102766	0.082	0.073	0.073	0.100176	0.0882963	0.112055
12	0.0981702	0.093536	0.0984412	0.0958213	0.103346	0.103904	0.0830814	0.0843546	0.108313	0.0877432	0.0965537	0.101798	0.0943324	0.074	0.09	0.065	0.0971987	0.0899355	0.104462
13	0.0893444	0.0832646	0.0900098	0.0933453	0.096755	0.0943549	0.0753072	0.080088	0.100745	0.0803325	0.0868389	0.105972	0.0863484	0.069	0.086	0.059	0.0866353	0.0813158	0.0919548
14	0.0861158	0.0763735	0.0840852	0.0865564	0.0917969	0.0867398	0.0692736	0.0795641	0.0924618	0.0745264	0.0821954	0.0996208	0.0790843	0.058	0.073	0.045	0.078406	0.0751292	0.0816827
15	0.0894453	0.0701738	0.0770446	0.0795223	0.0839155	0.0797735	0.0637681	0.0742006	0.0842066	0.0755326	0.0758585	0.0916317	0.0733222	0.048	0.068	0.039	0.0739887	0.0723459	0.0756316
16	0.0802589	0.065077	0.0706624	0.0742969	0.0762479	0.0736516	0.0599505	0.0687298	0.0762525	0.0693709	0.07028	0.0834174	0.0663969	0.041	0.065	0.037	0.0686364	0.0662174	0.0710553
17	0.072795	0.0604482	0.0671185	0.0700031	0.0737888	0.0697184	0.0566043	0.0658603	0.0712418	0.066366	0.0679864	0.0753656	0.0616907	0.039	0.064	0.035	0.0650349	0.0644217	0.065648
18	0.066562	0.0564977	0.0618748	0.0658367	0.0672518	0.0648819	0.052999	0.0637602	0.0667402	0.0627476	0.0645163	0.069575	0.058767	0.037	0.061	0.034	0.0613064	0.0601007	0.0625121
19	0.0615758	0.053875	0.0578224	0.0609353	0.0617699	0.0615341	0.0510391	0.0599381	0.0623934	0.0581925	0.0615946	0.0647756	0.0553482	0.034	0.059	0.033	0.0587776	0.0562567	0.0612984
20	0.0572045	0.0520801	0.0545203	0.0566086	0.0569604	0.0578793	0.0474546	0.0555451		0.0542724	0.056798	0.0616077	0.0528529	0.032	0.055	0.032	0.0557201	0.052642	0.0587981
21	0.0551899	0.0486454	0.0506717	0.05267	0.052698	0.0552719	0.0469907	0.0522231		0.0554724	0.0592888	0.057568		0.032	0.052	0.031	0.0535444	0.0492431	0.0578458
22	0.0521579	0.045953	0.0492605	0.0509056	0.0525681		0.0441834	0.0502585		0.0531303	0.0553334	0.0536674		0.031	0.05	0.029	0.0517884	0.0476772	0.0558996
23	0.0491737	0.0450103	0.047662	0.0489954	0.0503137		0.0420298	0.0490031		0.0504402	0.0538393	0.0502443		0.031	0.045	0.028	0.0496521	0.0457006	0.0536037
24	0.046786	0.0425903	0.0452582	0.0468133	0.047926			0.0476584		0.0472406	0.0512059	0.0476936		0.03	0.043	0.027	0.0483595	0.0460208	0.0506982
25	0.0447637	0.040206	0.042862	0.0457693	0.0455179					0.0446713	0.0489972	0.0468946		0.029	0.04	0.026	0.0455061	0.0435359	0.0474764
26	0.0427214	0.039255	0.0412415	0.0433819	0.0432279					0.0439741		0.043972		0.028	0.038	0.025	0.043114	0.0409975	0.0452305
27	0.0407446	0.0380496	0.0394656	0.0409396	0.0408817					0.0415166		0.041454		0.028	0.034	0.024	0.0419429	0.0393371	0.0445487
28		0.0364066	0.0379164	0.0393816	0.0394261					0.0394932		0.0394193		0.027	0.032	0.023	0.0398959	0.0375449	0.0422469
29		0.0351674	0.028	0.029						0.0377155		0.0376792		0.026	0.03	0.023	0.0387312	0.0372067	0.0402558
30			0.027	0.0186033						0.0367784				0.025	0.029	0.022	0.037404	0.0360008	0.0388072
31																	0.036754	0.0354114	0.0380966
32																	0.0355813	0.0346111	0.0365516
33																	0.0344536	0.0334377	0.0354694
34																	0.0338685	0.0323381	0.0353989
35																	0.0324645	0.0310338	0.0338951
36																		0.0297406	0.0331883
37																		0.0287384

## Sheet: 2) Log Basic Stats
MULTIVARIATE NORMALITY FOR LOG TRANSFORMED RATIOS
C30D/AB	Normal	K-S d=.02564, p> .20; Lilliefors p> .20, Shapiro-Wilk W=.99385, p=.20649
C30B/AB	Normal	K-S d=.05180, p> .20; Lilliefors p> .20, Shapiro-Wilk W=.98595, p=.05863
C30O/DO	Normal	K-S d=.04133, p> .20; Lilliefors p> .20, Shapiro-Wilk W=.99059, p=.08438
C20B/AB	Normal	K-S d=.02749, p> .20; Lilliefors p> .20, Shapiro-Wilk W=.99711, p=.83246
C10B/AB	Normal	K-S d=.03891, p> .20; Lilliefors p> .20, Shapiro-Wilk W=.99219, p=.08351
C5B/AB	Normal	K-S d=.06143, p>.20 ; Lilliefors p> .20, Shapiro-Wilk W=.96953, p=.05192
C20D/AB	Normal	K-S d=.04227, p> .20; Lilliefors p<.20, Shapiro-Wilk W=.99148, p=.05639
C10D/AB	Normal	K-S d=.03465, p> .20; Lilliefors p> .20, Shapiro-Wilk W=.99428, p=.25897
C5D/AB	Normal	K-S d=.07257, p> .20 ; Lilliefors p< .20, Shapiro-Wilk W=.98526, p=.06201
AO/OB	Normal	K-S d=.04326, p> .20; Lilliefors p<.15, Shapiro-Wilk W=.99203, p=.07655
S2/A	Normal	K-S d=.04578, p> .20; Lilliefors p<.10, Shapiro-Wilk W=.99565, p=.49864
CORRELATIONS (N=533)			Correlations marked in red are significant at p < .05000
	C30D/ AB	C30B/ AB	C30O/DO	C20B/ AB	C10B/ AB	C5B/ AB	C20D/ AB	C10D/ AB	C5D/ AB	AO/OB	S2/A
C30D/ AB	1
C30B/ AB	0.848363	1
C30O/DO	-0.101958	-0.611803	1
C20B/ AB	0.521666	0.688057	-0.523089	1
C10B/ AB	0.066315	0.277564	-0.433777	0.840541	1
C5B/ AB	-0.164828	0.0640097	-0.378287	0.632128	0.915601	1
C20D/ AB	0.73085	0.339269	0.453666	0.376398	0.130517	-0.0582722	1
C10D/ AB	-0.209914	-0.542282	0.705677	-0.122091	0.145446	0.185138	0.484549	1
C5D/ AB	-0.681023	-0.815133	0.510654	-0.283463	0.182974	0.389621	-0.0535555	0.814392	1
AO/OB	-0.848527	-0.999331	0.61122	-0.697032	-0.287626	-0.0727618	-0.340183	0.54512	0.814391	1
S2/A	-0.395223	-0.321182	0.0179321	-0.175104	-0.0548866	-0.028927	-0.301125	0.0256708	0.192364	0.319892	1

## Sheet: 3) Log Factor Analysis
Principal components
Value	Eigenvalue	% Total Variance	Cumulative Eigenvalue	Cumulative Variance(%)
1	5.68503	44.8914	4.97979	44.8909		Number of variables: 11
2	2.98353	27.9034	7.67016	72.7947		Method: Principal components
3	2.42841	21.9475	9.8921	94.7422		log(10) determinant of correlation matrix: -13.128
						Number of factors extracted: 3
94.7% of the variance explained by the first 3 factors						Eigenvalues: 5.685026 2.983527 2.428405
The rest accounted for less than 1%
						Analysis on log transformed ratio values
Kaiser and Scree Criteria were both consistent
Factor Loadings (Unrotated) (Finsh7.sta)
Extraction: Principal components
(Marked loadings are > .700000)
Comunaities Principal components; Rotation: Varimax normalized
	From 1 Factor	From 2 Factors	From 3 Factors	Multiple R-Square
AB-C30D	0.364285	0.366828	0.974759	0.995828
AB_C30B	0.750248	0.806998	0.98864	0.99936		There were virtually no residual correlations left (actually a few were about 0.1)
C30O_DO	0.573641	0.846468	0.9564	0.975379		It accounts for most of the variance and reproduces de correlation matrix with only minor disturbances.
AB_C20B	0.175637	0.830474	0.943435	0.985807
AB_C10B	4.86427e-06	0.977091	0.980535	0.98394		Aspect ratio was not highly correlated to any other ratio
AB_C5B	0.0254252	0.928308	0.940841	0.970111
AB_C20D	0.015628	0.0156304	0.946363	0.992035
AB_C10D	0.842766	0.857106	0.940813	0.98516
AB_C5D	0.890274	0.940206	0.981581	0.986507
AO_OB	0.750523	0.804831	0.988123	0.999461
S2/A	0.0165401	0.019185	0.996135	0.219709

## Sheet: 4) Log Discriminant
Discriminant Function Analysis Summary (FS8FactScores.sta)
No. of vars in model: 3; Grouping: Study Area (19 grps)
Wilks' Lambda: .44442 approx. F (33,922)=8.8617 p<0.0000
	Wilks' Lambda	Partial Lambda	F-remove (11,313)	p-level	Toler.	1-Toler (R-Square)
Factor 1	0.695971	0.638565	16.1056	5.47492e-25	0.976792	0.0232082		The 19 site Discriminant Analysis was highly significant
Factor 2	0.546703	0.812914	6.54858	7.80468e-10	0.97173	0.0282697		(0.44442, F (33,922)=8.8617 p<0.0000)
Factor 3	0.5342	0.83194	5.7481	1.8331e-08	0.994702	0.00529832
Squared Mahalanobis Distances
Study area	EN	SQ	BM	MZ	BB	PE	UG	SJ	BL	BK	SM	LP	TA	NA	VR	AL	TB	TL	HO
EN	0
SQ	0.514	0
BM	0.592	0.471	0
MZ	0.413	0.335	0.601	0
BB	2.221	0.587	0.583	0.619	0
PE	3.802	4.012	3.744	1.831	2.284	0
UG	0.548	0.479	1.413	0.872	1.671	4.214	0
SJ	3.104	1.181	0.944	1.173	0.18	5.03	2.69*	0
BL	1.563	1.304	1.928	0.96	2.403	3.122	0.35	3.553	0
BK	1.059	0.233	0.481	0.91	0.732	3.731	0.71	1.102	1.067	0
SM	4.602	2.143	1.817	2.162	0.749	4.684	2.872	0.85	2.883	1.872	0
LP	0.62	1.004	0.898	1.923	2.162	5.321	1.14	3.404	2.72	2.19	4.536	0
TA	4.438	2.242	2.146	1.711	1.424	1.573	2.234	1.773	1.643	1.664	0.415	4.983	0
NA	5.021	4.651	4.867	3.19	1.801	1.313	3.743	2.182	1.291	2.182	3.74	2.681	0.248	0
VR	4.343	5.08	5.321	4.201	2.123	1.404	2.913	2.331	1.194	1.831	4.191	2.434	0.335	0.287	0
AL	4.121	3.773	4.432	4.073	2.383	1.321	3.982	2.483	1.182	1.393	4.294	2.601	0.179	0.214	0.167	0
TB	4.29	4.312	4.876	3.654	2.461	1.063	3.654	2.564	1.323	1.413	3.593	2.832	0.473	0.402	0.371	0.275	0
TL	4.342	2.472	4.145	2.861	2.044	1.254	1.89	2.701	1.17	1.981	0.92	4.854	0.151	0.522	0.351	0.472	0.207	0
HO	6.141	3.851	3.143	3.962	3.073	0.998	3.223	3.751	2.124	3.322	1.242	6.522	0.397	0.86	0.744	0.634	0.355	0.163	0
	All sites showed significant differences, but were similar to at least one other location (P<.01)
	The most distinctive locations were La Paz and Puerto Escondido
	p-levels for Squared Mahalanobis Distances (Significant After Bonferroni Correction)
Study area	EN	SQ	BM	MZ	BB	PE	UG	SJ	BL	BK	SM	LP	TA	NA	VR	AL	TB	TL	HO
EN
SQ	0.0740918
BM	0.0809437	0.0926375
MZ	0.0725476	0.193845	0.0988731
BB	4.92479e-06	0.0463168	0.103349
PE	3.85915e-06	2.74859e-11	9.89776e-08	2.35988e-07	1.94754e-09
UG	0.0907355	0.119661	0.00364199	0.014538	0.000203696	0.000203646
SJ	5.34562e-08	0.00209973	0.0782219	0.000933419	0.516074	0.000960385	1.60008e-06
BL	0.000659253	0.00301169	8.76222e-05	0.0398558	1.31095e-05	0.000187253	0.314064	2.01819e-07
BK	0.00259431	0.328952	0.0211744	0.0137791	0.0178116	0.000746294	0.0322553	0.00294775	0.018431
SM	1.68242e-11	7.2784e-06	1.34245e-05	9.13887e-05	0.0246448	0.0310395	5.85496e-07	0.0198171	2.91551e-06	2.34067e-05
LP	0.038847	0.00326929	0.02198	1.28968e-06	3.01493e-06	0.000100564	0.0132356	9.69134e-09	2.66784e-06	1.53989e-06	1.34483e-11
TA	8.71878e-10	2.11006e-05	1.05508e-05	1.05508e-05	0.00139679	0.000205628	5.49794e-05	0.000456157	0.00187933	0.00034068	0.220064	3.40638e-11
NA	6.48503e-10	3.22849e-10	4.85676e-10	4.85676e-10	1.13418e-09	0.000648265	0.000216089	0.000108044	5.40225e-05	9.48273e-09	0.000216089	7.01843e-10	0.454327
VR	2.64786e-10	4.74829e-12	1.34767e-10	1.34767e-10	3.99553e-10	0.00439561	0.00014652	7.32603e-05	3.66303e-05	8.36629e-08	0.0014652	2.23029e-10	0.309473	0.135545
AL	1.83659e-09	2.74583e-09	2.29121e-09	2.29121e-09	4.1278e-09	0.00645927	0.000215309	0.000107656	5.38301e-05	0.000301387	0.00215309	2.90341e-09	0.294549	0.252866	0.179531
TB	8.46274e-11	1.73859e-10	1.29243e-10	1.29243e-10	2.13871e-10	0.00439879	0.000146626	7.33132e-05	3.66567e-05	0.000102358	0.00146626	1.57452e-10	0.366428	0.305246	0.171687	0.175266
TL	7.51078e-13	5.17841e-08	2.58924e-08	2.58924e-08	1.39083e-06	0.00219838	1.03097e-05	8.11922e-08	0.0630948	1.13797e-06	0.0542863	1.02185e-14	0.574443	0.287373	0.215755	0.272987	0.207134
HO	1.89679e-17	5.31927e-12	2.65965e-12	2.65965e-12	1.88468e-09	0.0514992	6.82344e-09	2.14917e-10	2.20011e-05	1.55812e-10	0.000615346	7.24805e-19	0.174354	0.214916	0.345247	0.363452	0.161357	0.372474
Classification Functions; grouping: StudyArea
	EN	SQ	BM	MZ	BB	PE	UG	SJ	BL	BK	SM	LP	TA	NA	VR	AL	TB	TL	HO
	p=.08257	p=.08869	p=.07235	p=.09045	p=.08563	p=.06927	p=.07034	p=.07339	p=.05810	p=.09174	p=.07645	p=.08869	p=.06116	p=.09843	p=.08134	p=.09023	p=.11472	p=.11315	p=.11009
Factor 1	-1.28016	-0.775675	-0.565028	-1.02792	-0.346336	-0.0527	-0.393849	-0.416449	0.150107	-0.597307	0.669881	-1.10754	0.920161	1.50308	1.50792	1.77674	1.08648	1.09434	1.59319
Factor 2	-0.718853	-0.197315	-0.475228	-0.458084	0.191494	-0.167195	-0.532455	0.59003	-0.231602	0.266876	0.537686	-1.24582	0.581446	0.386199	0.393	0.450198	0.461943	0.305005	0.389495
Factor 3	-0.480804	-0.0206052	-0.696134	-0.250705	0.642525	0.401024	-0.573109	0.864061	-0.911464	-0.221468	0.735017	0.095758	0.0870848	-0.159109	-0.177695	-0.167548	0.287954	-0.193306	-0.104093
Constant	-3.24828	-2.62527	-3.2369	-2.93677	-2.69101	-2.68524	-2.93001	-3.13794	-3.22553	-2.58492	-3.01903	-3.35922	-3.16538	-3.14039	-3.22451	-3.62808	-3.07971	-2.60365	-3.06428
The nature of the discrimination examinated by Canonical Analysis showed that three roots significantly
contributed to the discrimination of localities (P<005)
Chi-Square Tests with Successive Roots Removed
	Eigen-	Canonicl	Wilks'	Chi-Sqr.	df	p-level
0	0.670901	0.633656	0.444422	258.297	33	0
1	0.24961	0.446934	0.742586	94.7909	20	1.06474e-11
2	0.0776529	0.268435	0.927943	23.8192	9	0.00459658
The standardized coefficients for these three roots indicated that the first root was weighted more heavely by Factor 1,
The second root was marked by Factor 3 and the third root was characterized by Factor 2.
Eigen values derived from Canonical Discriminant Analysis showed that 100% of the discrimination among groups could be acounted for these roots
Root 1 was the most useful for group discrimination. This root accounted for 70% of the variance.
The discriminatory power for Roots 2 and 3 was 22% and 8% respectively.
Standardized Coefficients for Canonical Variables
	Root 1	Root 2	Root 3
Factor 1	-0.932611	-0.275591	-0.279367
Factor 2	-0.524464	0.466187	0.732597
Factor 3	-0.0987126	0.854803	-0.514678
Eigenval	0.670901	0.24961	0.0776529
Cum.Prop	0.672135	0.922204	1
Factor Structure Matrix Correlations Variables - Canonical Roots (Pooled-within-groups correlations)
	Root 1	Root 2	Root 3
Factor 1	0.888374	-0.445762	-0.109947
Factor 2	0.271524	0.608085	0.745994
Factor 3	0.182733	0.685863	-0.704415

## Sheet: 5) For Mantel's test
									Squared Mahalanobis Distances
Study area	EN	SQ	BM	MZ	BB	PE	UG	SJ	BL	BK	SM	LP	TA	NA	VR	AL	TB	TL	HO
EN	0
SQ	0.514	0
BM	0.592	0.471	0
MZ	0.413	0.335	0.601	0
BB	2.221	0.587	0.583	0.619	0
PE	3.802	4.012	3.744	1.831	2.284	0
UG	0.548	0.479	1.413	0.872	1.671	4.214	0
SJ	3.104	1.181	0.944	1.173	0.18	5.03	2.69*	0
BL	1.563	1.304	1.928	0.96	2.403	3.122	0.35	3.553	0
BK	1.059	0.233	0.481	0.91	0.732	3.731	0.71	1.102	1.067	0
SM	4.602	2.143	1.817	2.162	0.749	4.684	2.872	0.85	2.883	1.872	0
LP	0.62	1.004	0.898	1.923	2.162	5.321	1.14	3.404	2.72	2.19	4.536	0
TA	4.438	2.242	2.146	1.711	1.424	1.573	2.234	1.773	1.643	1.664	0.415	4.983	0
NA	5.021	4.651	4.867	3.19	1.801	1.313	3.743	2.182	1.291	2.182	3.74	2.681	0.248	0
VR	4.343	5.08	5.321	4.201	2.123	1.404	2.913	2.331	1.194	1.831	4.191	2.434	0.335	0.287	0
AL	4.121	3.773	4.432	4.073	2.383	1.321	3.982	2.483	1.182	1.393	4.294	2.601	0.179	0.214	0.167	0
TB	4.29	4.312	4.876	3.654	2.461	1.063	3.654	2.564	1.323	1.413	3.593	2.832	0.473	0.402	0.371	0.275	0
TL	4.342	2.472	4.145	2.861	2.044	1.254	1.89	2.701	1.17	1.981	0.92	4.854	0.151	0.522	0.351	0.472	0.207	0
HO	6.141	3.851	3.143	3.962	3.073	0.998	3.223	3.751	2.124	3.322	1.242	6.522	0.397	0.86	0.744	0.634	0.355	0.163	0
										Coastal habits distances
Study area	EN	SQ	BM	MZ	BB	PE	UG	SJ	BL	BK	SM	LP	TA	NA	VR	AL	TB	TL	HO
EN	0
SQ	220	0
BM	1352	1132	0
MZ	4140	3920	2788	0
BB	4540	4320	3188	400	0
PE	5748	5528	4396	1608	1208	0
UG	2870	2650	1607	1439	1720	3047	0
SJ	3040	2820	1737	1269	1580	2877	170	0
BL	2520	2300	1257	1789	2020	3397	350	480	0
BK	3340	3120	2007	969	1380	2577	450	300	750	0
SM	3730	3510	2677	279	600	1887	1110	980	1420	690	0
LP	1820	1600	557	2489	2720	3978	1050	1180	700	1450	2120	0
TA	-	-	-	-	-	-	-	-	-	-	-	-	0
NA	-	-	-	-	-	-	-	-	-	-	-	-	137	0
VR	-	-	-	-	-	-	-	-	-	-	-	-	284	147	0
AL	-	-	-	-	-	-	-	-	-	-	-	-	348	211	64	0
TB	-	-	-	-	-	-	-	-	-	-	-	-	695	558	411	347	0
TL	-	-	-	-	-	-	-	-	-	-	-	-	786	748	601	537	126	0
HO	-	-	-	-	-	-	-	-	-	-	-	-	1428	1326	1179	1115	768	642	0

## Sheet: Hoja2
1.181	2006
0.2425	1834
1.9824	534
0.9223	214
3.382	2615
2.0653	2375
0.6653	142
0.4009	2380
0.8879	1128
0.7622	172
0.8459	1542
3.2797	2281
6.5605	3130
4.6902	2900
1.9191	2096
2.342	2920
2.8708	1767
0.8644	1370
0.9685	2109
3.8402	3080
2.4708	2820
0.7797	1924
1.104	2780
0.6837	1595
2.8373	742
6.4117	2380
4.8133	2075
2.3163	639
3.6905	2000
2.0654	653
3.9632	2706
2.8601	2480
1.9414	150
1.7236	2500
0.216	1300
0.1689	347
1.392	270
2.1396	580
2.8899	1915
0.6091	2521
1.1635	257
1.9773	1580
0.5005	2530
1.2309	1242
1.6039	1480

## Sheet: Hoja3
-0.442498	0
-0.442498	0.0002
-0.431745	0.0002
-0.431745	0
-0.431745	0
-0.431745	0.0003
-0.420992	0.0003
-0.420992	0
-0.420992	0
-0.420992	0
-0.410239	0
-0.410239	0
-0.410239	0
-0.410239	0.0001
-0.399486	0.0001
-0.399486	0
-0.399486	0
-0.399486	0.0003
-0.388734	0.0003
-0.388734	0
-0.388734	0
-0.388734	0.0004
-0.377981	0.0004
-0.377981	0
-0.377981	0
-0.377981	0.0005
-0.367228	0.0005
-0.367228	0
-0.367228	0
-0.367228	0.0009
-0.356475	0.0009
-0.356475	0
-0.356475	0
-0.356475	0.0013
-0.345722	0.0013
-0.345722	0
-0.345722	0
-0.345722	0.0013
-0.33497	0.0013
-0.33497	0
-0.33497	0
-0.33497	0.0026
-0.324217	0.0026
-0.324217	0
-0.324217	0
-0.324217	0.0011
-0.313464	0.0011
-0.313464	0
-0.313464	0
-0.313464	0.0019
-0.302711	0.0019
-0.302711	0
-0.302711	0
-0.302711	0.0033
-0.291959	0.0033
-0.291959	0
-0.291959	0
-0.291959	0.0042
-0.281206	0.0042
-0.281206	0
-0.281206	0
-0.281206	0.0061
-0.270453	0.0061
-0.270453	0
-0.270453	0
-0.270453	0.0072
-0.2597	0.0072
-0.2597	0
-0.2597	0
-0.2597	0.0084
-0.248947	0.0084
-0.248947	0
-0.248947	0
-0.248947	0.0083
-0.238195	0.0083
-0.238195	0
-0.238195	0
-0.238195	0.0093
-0.227442	0.0093
-0.227442	0
-0.227442	0
-0.227442	0.0104
-0.216689	0.0104
-0.216689	0
-0.216689	0
-0.216689	0.0117
-0.205936	0.0117
-0.205936	0
-0.205936	0
-0.205936	0.014
-0.195183	0.014
-0.195183	0
-0.195183	0
-0.195183	0.0144
-0.184431	0.0144
-0.184431	0
-0.184431	0
-0.184431	0.0152
-0.173678	0.0152
-0.173678	0
-0.173678	0
-0.173678	0.0176
-0.162925	0.0176
-0.162925	0
-0.162925	0
-0.162925	0.016
-0.152172	0.016
-0.152172	0
-0.152172	0
-0.152172	0.0161
-0.14142	0.0161
-0.14142	0
-0.14142	0
-0.14142	0.0186
-0.130667	0.0186
-0.130667	0
-0.130667	0
-0.130667	0.0214
-0.119914	0.0214
-0.119914	0
-0.119914	0
-0.119914	0.0222
-0.109161	0.0222
-0.109161	0
-0.109161	0
-0.109161	0.0255
-0.0984084	0.0255
-0.0984084	0
-0.0984084	0
-0.0984084	0.0257
-0.0876556	0.0257
-0.0876556	0
-0.0876556	0
-0.0876556	0.0269
-0.0769028	0.0269
-0.0769028	0
-0.0769028	0
-0.0769028	0.0292
-0.06615	0.0292
-0.06615	0
-0.06615	0
-0.06615	0.0308
-0.0553972	0.0308
-0.0553972	0
-0.0553972	0
-0.0553972	0.0293
-0.0446444	0.0293
-0.0446444	0
-0.0446444	0
-0.0446444	0.0282
-0.0338916	0.0282
-0.0338916	0
-0.0338916	0
-0.0338916	0.0288
-0.0231389	0.0288
-0.0231389	0
-0.0231389	0
-0.0231389	0.0287
-0.0123861	0.0287
-0.0123861	0
-0.0123861	0
-0.0123861	0.0332
-0.00163328	0.0332
-0.00163328	0
-0.00163328	0
-0.00163328	0.0299
0.00911951	0.0299
0.00911951	0
0.00911951	0
0.00911951	0.0326
0.0198723	0.0326
0.0198723	0
0.0198723	0
0.0198723	0.0291
0.0306251	0.0291
0.0306251	0
0.0306251	0
0.0306251	0.0304
0.0413779	0.0304
0.0413779	0
0.0413779	0
0.0413779	0.0278
0.0521307	0.0278
0.0521307	0
0.0521307	0
0.0521307	0.0282
0.0628834	0.0282
0.0628834	0
0.0628834	0
0.0628834	0.0241
0.0736362	0.0241
0.0736362	0
0.0736362	0
0.0736362	0.0217
0.084389	0.0217
0.084389	0
0.084389	0
0.084389	0.0201
0.0951418	0.0201
0.0951418	0
0.0951418	0
0.0951418	0.0223
0.105895	0.0223
0.105895	0
0.105895	0
0.105895	0.0183
0.116647	0.0183
0.116647	0
0.116647	0
0.116647	0.019
0.1274	0.019
0.1274	0
0.1274	0
0.1274	0.0142
0.138153	0.0142
0.138153	0
0.138153	0
0.138153	0.0138
0.148906	0.0138
0.148906	0
0.148906	0
0.148906	0.0133
0.159659	0.0133
0.159659	0
0.159659	0
0.159659	0.0108
0.170411	0.0108
0.170411	0
0.170411	0
0.170411	0.0119
0.181164	0.0119
0.181164	0
0.181164	0
0.181164	0.0109
0.191917	0.0109
0.191917	0
0.191917	0
0.191917	0.0092
0.20267	0.0092
0.20267	0
0.20267	0
0.20267	0.0074
0.213422	0.0074
0.213422	0
0.213422	0
0.213422	0.0091
0.224175	0.0091
0.224175	0
0.224175	0
0.224175	0.0065
0.234928	0.0065
0.234928	0
0.234928	0
0.234928	0.0052
0.245681	0.0052
0.245681	0
0.245681	0
0.245681	0.0055
0.256434	0.0055
0.256434	0
0.256434	0
0.256434	0.0065
0.267186	0.0065
0.267186	0
0.267186	0
0.267186	0.0057
0.277939	0.0057
0.277939	0
0.277939	0
0.277939	0.0039
0.288692	0.0039
0.288692	0
0.288692	0
0.288692	0.0042
0.299445	0.0042
0.299445	0
0.299445	0
0.299445	0.0042
0.310198	0.0042
0.310198	0
0.310198	0
0.310198	0.0044
0.32095	0.0044
0.32095	0
0.32095	0
0.32095	0.0023
0.331703	0.0023
0.331703	0
0.331703	0
0.331703	0.0036
0.342456	0.0036
0.342456	0
0.342456	0
0.342456	0.003
0.353209	0.003
0.353209	0
0.353209	0
0.353209	0.0019
0.363962	0.0019
0.363962	0
0.363962	0
0.363962	0.0031
0.374714	0.0031
0.374714	0
0.374714	0
0.374714	0.0014
0.385467	0.0014
0.385467	0
0.385467	0
0.385467	0.0027
0.39622	0.0027
0.39622	0
0.39622	0
0.39622	0.0008
0.406973	0.0008
0.406973	0
0.406973	0
0.406973	0.001
0.417725	0.001
0.417725	0
0.417725	0
0.417725	0.0013
0.428478	0.0013
0.428478	0
0.428478	0
0.428478	0.0007
0.439231	0.0007
0.439231	0
0.439231	0
0.439231	0.0004
0.449984	0.0004
0.449984	0
0.449984	0
0.449984	0.001
0.460737	0.001
0.460737	0
0.460737	0
0.460737	0.0005
0.471489	0.0005
0.471489	0
0.471489	0
0.471489	0.0004
0.482242	0.0004
0.482242	0
0.482242	0
0.482242	0.0005
0.492995	0.0005
0.492995	0
0.492995	0
0.492995	0.0003
0.503748	0.0003
0.503748	0
0.503748	0
0.503748	0.0002
0.514501	0.0002
0.514501	0
0.514501	0
0.514501	0.0005
0.525253	0.0005
0.525253	0
0.525253	0
0.525253	0.0003
0.536006	0.0003
0.536006	0
0.536006	0
0.536006	0.0008
0.546759	0.0008
0.546759	0
0.546759	0
0.546759	0.0001
0.557512	0.0001
0.557512	0
0.557512	0
0.557512	0.0002
0.568264	0.0002
0.568264	0
0.568264	0
0.568264	0.0003
0.579017	0.0003
0.579017	0
0.579017	0
0.579017	0.0001
0.58977	0.0001
0.58977	0
0.58977	0
0.58977	0.0004
0.600523	0.0004
0.600523	0
0.600523	0
0.600523	0.0003
0.611276	0.0003
0.611276	0
0.611276	0
0.611276	0
0.622028	0
0.622028	0
0.622028	0
0.622028	0.0001
0.632781	0.0001
0.632781	0
0.444607	0.00934
0.444607	0.00602
0.433855	0.00602
0.444607	0.00436
0.45536	0.00602
0.444607	0.00602

## Sheet: Hoja5
18	26
3	22
26	8
14	4
38	38
27	31
7	1
4	32.5
13	13
9	3
11	18
37	30
45	45
42	42
23	28
31	43
35	21
12	16
15	29
40	44
32	41
10	24
16	40
8	20
33	12
44	32.5
43	27
30	10
39	25
28	11
41	39
34	34
24	2
22	35
2	15
1	7
20	6
29	9
36	23
6	36
17	5
25	19
5	37
19	14
21	17

## Sheet: Hoja6
-0.504299	0
-0.504299	0.0001
-0.492761	0.0001
-0.492761	0
-0.492761	0
-0.492761	0
-0.481224	0
-0.481224	0
-0.481224	0
-0.481224	0
-0.469687	0
-0.469687	0
-0.469687	0
-0.469687	0
-0.458149	0
-0.458149	0
-0.458149	0
-0.458149	0
-0.446612	0
-0.446612	0
-0.446612	0
-0.446612	0
-0.435075	0
-0.435075	0
-0.435075	0
-0.435075	0
-0.423538	0
-0.423538	0
-0.423538	0
-0.423538	0.0003
-0.412	0.0003
-0.412	0
-0.412	0
-0.412	0.0005
-0.400463	0.0005
-0.400463	0
-0.400463	0
-0.400463	0.0005
-0.388926	0.0005
-0.388926	0
-0.388926	0
-0.388926	0.0005
-0.377389	0.0005
-0.377389	0
-0.377389	0
-0.377389	0.0009
-0.365851	0.0009
-0.365851	0
-0.365851	0
-0.365851	0.0008
-0.354314	0.0008
-0.354314	0
-0.354314	0
-0.354314	0.0017
-0.342777	0.0017
-0.342777	0
-0.342777	0
-0.342777	0.0028
-0.33124	0.0028
-0.33124	0
-0.33124	0
-0.33124	0.002
-0.319702	0.002
-0.319702	0
-0.319702	0
-0.319702	0.0023
-0.308165	0.0023
-0.308165	0
-0.308165	0
-0.308165	0.002
-0.296628	0.002
-0.296628	0
-0.296628	0
-0.296628	0.0041
-0.28509	0.0041
-0.28509	0
-0.28509	0
-0.28509	0.005
-0.273553	0.005
-0.273553	0
-0.273553	0
-0.273553	0.005
-0.262016	0.005
-0.262016	0
-0.262016	0
-0.262016	0.0079
-0.250479	0.0079
-0.250479	0
-0.250479	0
-0.250479	0.0087
-0.238941	0.0087
-0.238941	0
-0.238941	0
-0.238941	0.0078
-0.227404	0.0078
-0.227404	0
-0.227404	0
-0.227404	0.0124
-0.215867	0.0124
-0.215867	0
-0.215867	0
-0.215867	0.0132
-0.20433	0.0132
-0.20433	0
-0.20433	0
-0.20433	0.0163
-0.192792	0.0163
-0.192792	0
-0.192792	0
-0.192792	0.0146
-0.181255	0.0146
-0.181255	0
-0.181255	0
-0.181255	0.0194
-0.169718	0.0194
-0.169718	0
-0.169718	0
-0.169718	0.0201
-0.15818	0.0201
-0.15818	0
-0.15818	0
-0.15818	0.0212
-0.146643	0.0212
-0.146643	0
-0.146643	0
-0.146643	0.0193
-0.135106	0.0193
-0.135106	0
-0.135106	0
-0.135106	0.0238
-0.123569	0.0238
-0.123569	0
-0.123569	0
-0.123569	0.0241
-0.112031	0.0241
-0.112031	0
-0.112031	0
-0.112031	0.0252
-0.100494	0.0252
-0.100494	0
-0.100494	0
-0.100494	0.029
-0.0889568	0.029
-0.0889568	0
-0.0889568	0
-0.0889568	0.0288
-0.0774195	0.0288
-0.0774195	0
-0.0774195	0
-0.0774195	0.0272
-0.0658823	0.0272
-0.0658823	0
-0.0658823	0
-0.0658823	0.0294
-0.054345	0.0294
-0.054345	0
-0.054345	0
-0.054345	0.03
-0.0428077	0.03
-0.0428077	0
-0.0428077	0
-0.0428077	0.0309
-0.0312705	0.0309
-0.0312705	0
-0.0312705	0
-0.0312705	0.03
-0.0197332	0.03
-0.0197332	0
-0.0197332	0
-0.0197332	0.0271
-0.00819592	0.0271
-0.00819592	0
-0.00819592	0
-0.00819592	0.0313
0.00334135	0.0313
0.00334135	0
0.00334135	0
0.00334135	0.0264
0.0148786	0.0264
0.0148786	0
0.0148786	0
0.0148786	0.0315
0.0264159	0.0315
0.0264159	0
0.0264159	0
0.0264159	0.0325
0.0379532	0.0325
0.0379532	0
0.0379532	0
0.0379532	0.0322
0.0494904	0.0322
0.0494904	0
0.0494904	0
0.0494904	0.029
0.0610277	0.029
0.0610277	0
0.0610277	0
0.0610277	0.0238
0.072565	0.0238
0.072565	0
0.072565	0
0.072565	0.0246
0.0841022	0.0246
0.0841022	0
0.0841022	0
0.0841022	0.0259
0.0956395	0.0259
0.0956395	0
0.0956395	0
0.0956395	0.0207
0.107177	0.0207
0.107177	0
0.107177	0
0.107177	0.0194
0.118714	0.0194
0.118714	0
0.118714	0
0.118714	0.0186
0.130251	0.0186
0.130251	0
0.130251	0
0.130251	0.0179
0.141789	0.0179
0.141789	0
0.141789	0
0.141789	0.0171
0.153326	0.0171
0.153326	0
0.153326	0
0.153326	0.015
0.164863	0.015
0.164863	0
0.164863	0
0.164863	0.0141
0.1764	0.0141
0.1764	0
0.1764	0
0.1764	0.0138
0.187938	0.0138
0.187938	0
0.187938	0
0.187938	0.0108
0.199475	0.0108
0.199475	0
0.199475	0
0.199475	0.0097
0.211012	0.0097
0.211012	0
0.211012	0
0.211012	0.0101
0.222549	0.0101
0.222549	0
0.222549	0
0.222549	0.0076
0.234087	0.0076
0.234087	0
0.234087	0
0.234087	0.0079
0.245624	0.0079
0.245624	0
0.245624	0
0.245624	0.0064
0.257161	0.0064
0.257161	0
0.257161	0
0.257161	0.0075
0.268699	0.0075
0.268699	0
0.268699	0
0.268699	0.0049
0.280236	0.0049
0.280236	0
0.280236	0
0.280236	0.0072
0.291773	0.0072
0.291773	0
0.291773	0
0.291773	0.0038
0.30331	0.0038
0.30331	0
0.30331	0
0.30331	0.0043
0.314848	0.0043
0.314848	0
0.314848	0
0.314848	0.0033
0.326385	0.0033
0.326385	0
0.326385	0
0.326385	0.0041
0.337922	0.0041
0.337922	0
0.337922	0
0.337922	0.0038
0.349459	0.0038
0.349459	0
0.349459	0
0.349459	0.0031
0.360997	0.0031
0.360997	0
0.360997	0
0.360997	0.0028
0.372534	0.0028
0.372534	0
0.372534	0
0.372534	0.0025
0.384071	0.0025
0.384071	0
0.384071	0
0.384071	0.002
0.395609	0.002
0.395609	0
0.395609	0
0.395609	0.0022
0.407146	0.0022
0.407146	0
0.407146	0
0.407146	0.0014
0.418683	0.0014
0.418683	0
0.418683	0
0.418683	0.0007
0.43022	0.0007
0.43022	0
0.43022	0
0.43022	0.0009
0.441758	0.0009
0.441758	0
0.441758	0
0.441758	0.0005
0.453295	0.0005
0.453295	0
0.453295	0
0.453295	0.0005
0.464832	0.0005
0.464832	0
0.464832	0
0.464832	0.0005
0.476369	0.0005
0.476369	0
0.476369	0
0.476369	0.0004
0.487907	0.0004
0.487907	0
0.487907	0
0.487907	0.0002
0.499444	0.0002
0.499444	0
0.499444	0
0.499444	0.0003
0.510981	0.0003
0.510981	0
0.510981	0
0.510981	0.0005
0.522519	0.0005
0.522519	0
0.522519	0
0.522519	0.0001
0.534056	0.0001
0.534056	0
0.534056	0
0.534056	0.0003
0.545593	0.0003
0.545593	0
0.545593	0
0.545593	0
0.55713	0
0.55713	0
0.55713	0
0.55713	0.0002
0.568668	0.0002
0.568668	0
0.568668	0
0.568668	0.0004
0.580205	0.0004
0.580205	0
0.580205	0
0.580205	0
0.591742	0
0.591742	0
0.591742	0
0.591742	0.0001
0.603279	0.0001
0.603279	0
0.603279	0
0.603279	0.0001
0.614817	0.0001
0.614817	0
0.614817	0
0.614817	0.0001
0.626354	0.0001
0.626354	0
0.626354	0
0.626354	0
0.637891	0
0.637891	0
0.637891	0
0.637891	0.0001
0.649429	0.0001
0.649429	0
0.412914	0.0096
0.412914	0.00635
0.401377	0.00635
0.412914	0.004725
0.424452	0.00635
0.412914	0.00635

## Sheet: Hoja8
18	26
3	22
26	8
14	4
38	38
27	31
7	1
4	32.5
13	13
9	3
11	18
37	30
45	45
42	42
23	28
31	43
35	21
12	16
15	29
40	44
32	41
10	24
16	40
8	20
33	12
44	32.5
43	27
30	10
39	25
28	11
41	39
34	34
24	2
22	35
2	15
1	7
20	6
29	9
36	23
6	36
17	5
25	19
5	37
19	14
21	17

[truncated: 41 more sheets: Hoja9, Hoja11, Hoja12, Hoja14, Hoja15, Hoja17, Hoja18, Hoja20, Hoja21, Hoja4, Hoja7, Hoja13, Hoja16, Hoja10, Hoja19, Sheet4, Sheet3, Sheet7, Sheet6, Sheet10 …]
